# Supplementary material for: A magnetic nanoparticle functionalized reduced graphene oxide-based drug carrier system for a chemo-photodynamic cancer therapy
Source: Royal Society of Chemistry journal article supplement (doi:10.1039/d0nj00049c), 2020-01-01
Supplement: d0nj00049c1.pdf [file d0nj00049c1.pdf]

## Supporting information

### **Magnetic Nanoparticles Functionalized Reduced Graphene Oxide-Based Drug Carrier System for Chemo-Photodynamic Cancer Therapy**

**Kandasamy Vinothini<sup>ab</sup>, Naresh Kumar Rajendran<sup>c</sup>, Mariappan Rajan<sup>b\*</sup>, Andy Ramu<sup>a\*</sup>,  
Najat Marraiki<sup>d</sup>, Abdallah M.Elgorban<sup>de</sup>**

<sup>a</sup>Department of Inorganic chemistry, School of Chemistry, Madurai Kamaraj University, Madurai 625021, Tamil Nadu, India.

<sup>b</sup>Biomaterials in Medicinal Chemistry Laboratory, Department of Natural Products Chemistry, School of Chemistry, Madurai Kamaraj University, Madurai 625021, Tamil Nadu, India.

<sup>c</sup>Laser Research Centre, Faculty of Health Sciences, University of Johannesburg, Doornfontein, 2028, Johannesburg, South Africa.

<sup>d</sup>Department of Botany and Microbiology, College of Science, King Saud University, P.O.Box 2455, Riyadh 11451, Saudi Arabia

<sup>e</sup>Centre of Excellence in Biotechnology Research, King Saud University, P.O Box 2455, Riyadh 11451, Saudi Arabia

\*Corresponding author

Mariappan Rajan, Biomaterials in Medicinal Chemistry Laboratory, Department of Natural Products Chemistry, School of Chemistry, Madurai Kamaraj University, Madurai - 625021, India. Tel: +91 9488014084; Fax: 0452-2459845; Email: rajanm153@gmail.com.

## Supporting information

### 1. Atomic Force Microscopy

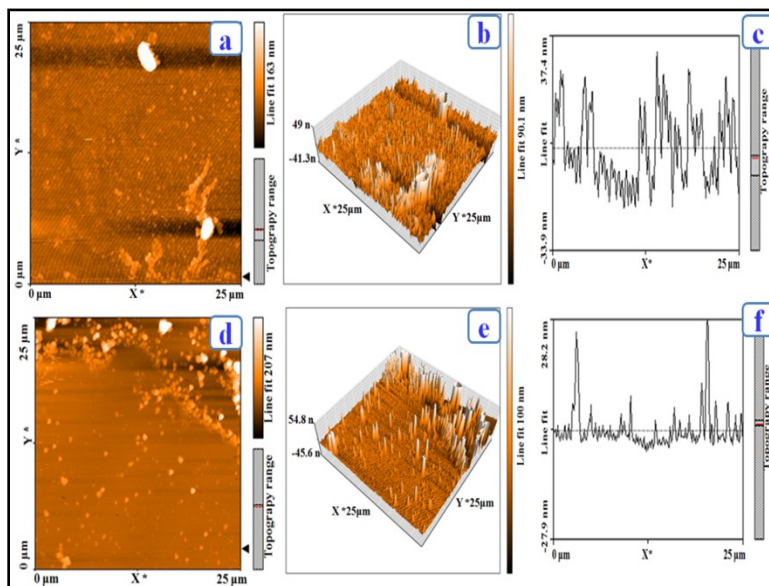

**S.Figure1.** AFM images for morphological study of (a-c) MrGO-AA-g-4-HC and (d-f) CPT-loaded MrGO-AA-g-4-HC nanocarrier.

### 2. Particle size and zeta potential analysis

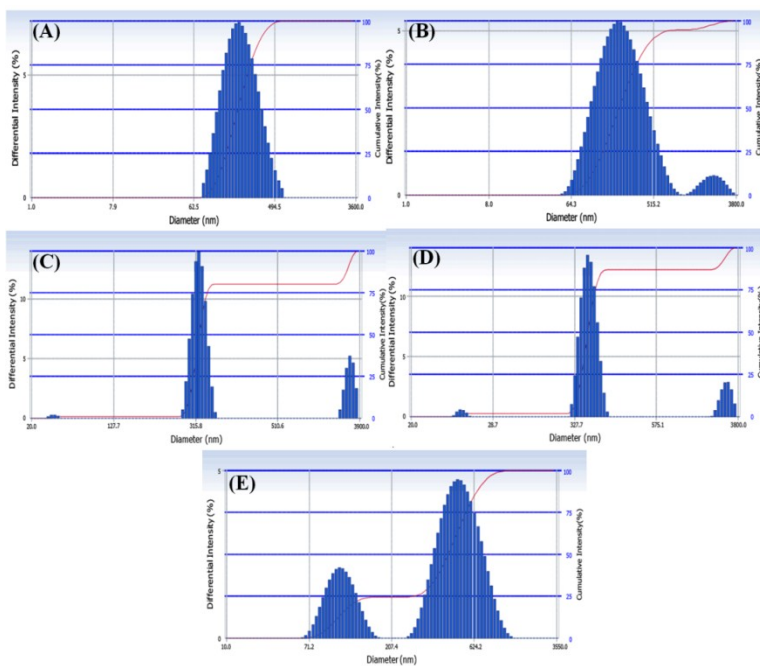

**S.Figure2(A).** Particle size of (A) MrGO-AA-g-4-HC and (B,C,D& E) CPT-loaded MrGO-AA-g-4-HC system in different medium water, PBS, FBS and DMEM respectively after 24 h.

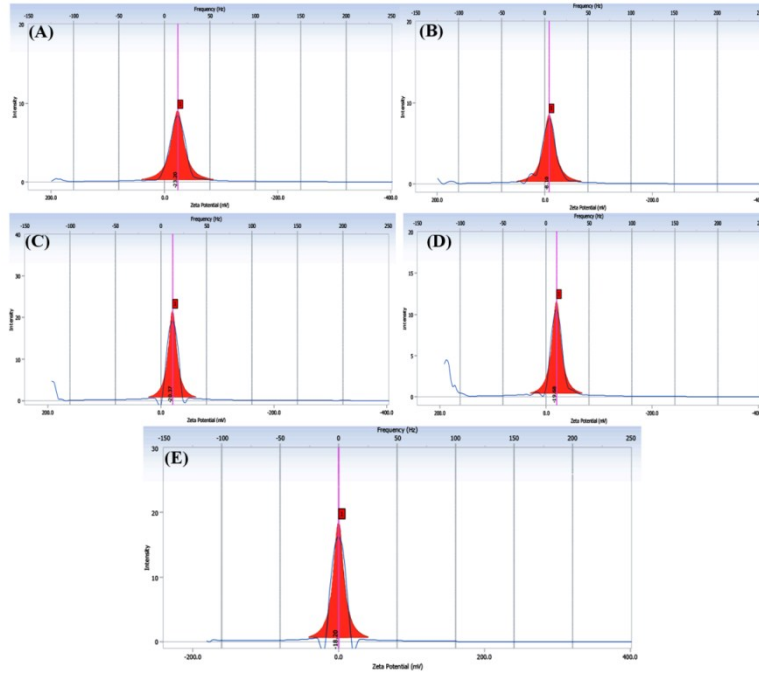

**S.Figure2(B).** Zeta-potential images of (A) MrGO-AA-g-4-HC and (B,C,D& E) CPT-loaded MrGO-AA-g-4-HC nanocarrier in different medium water, PBS, FBS and DMEM respectively after 24 h.

### ***3. Drug entrapment efficiency, loading capacity and in-vitro drug release profiles***

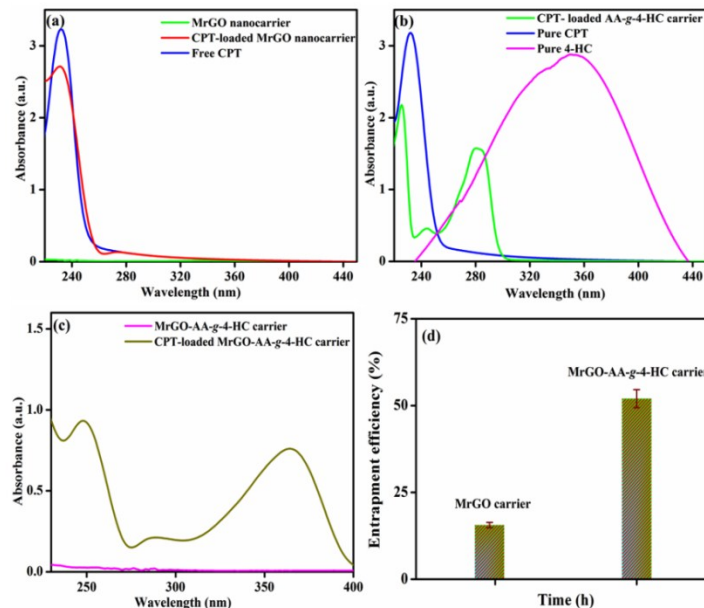

**S.Figure3.**(a) Entrapment efficiency of CPT loaded MrGO nanocarrier, (b) entrapment efficiency of CPT loaded MrGO-AA-g-4-HC nanocarrier at UV-Vis spectrum of pure camptothecin  $\lambda_{\max}$ -263 nm, pure 4-hydroxy coumarin  $\lambda_{\max}$ -353 nm and CPT-loaded MrGO-AA-g-4-HC nanocarrier. (c) Loading capacity of CPT-loaded MrGO-AA-g-4-HC nanocarrier, and (d) CPT entrapment effcapacity profile of CPT on MrGO and MrGO-AA-g-4-HC nanocarriers in 24 h time periods respectively.

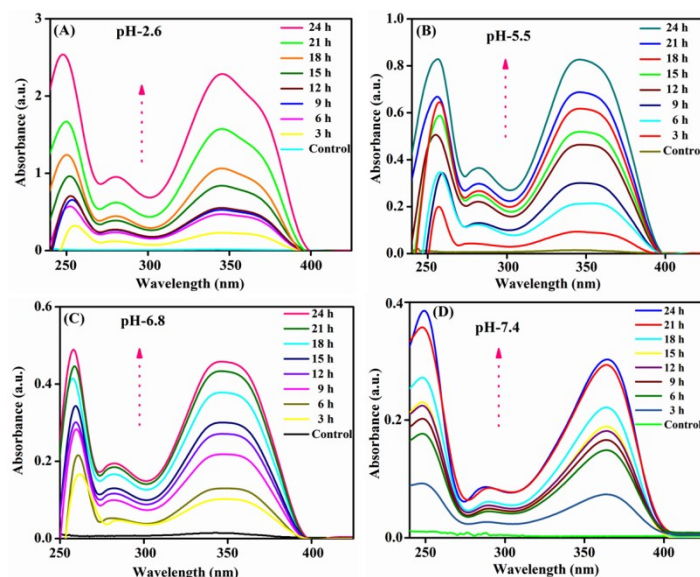

**S.Figure4.** *In-vitro* drug release profiles of CPT and 4-HC from MrGO-AA-g-4-HC/CPT nanocarrier in various PBS solutions at (a) pH-2.6, (b) 5.5, (c) 6.8 and (d) 7.4 at time dependent manner.

#### 4. Intracellular photodynamic effect and nuclear damage

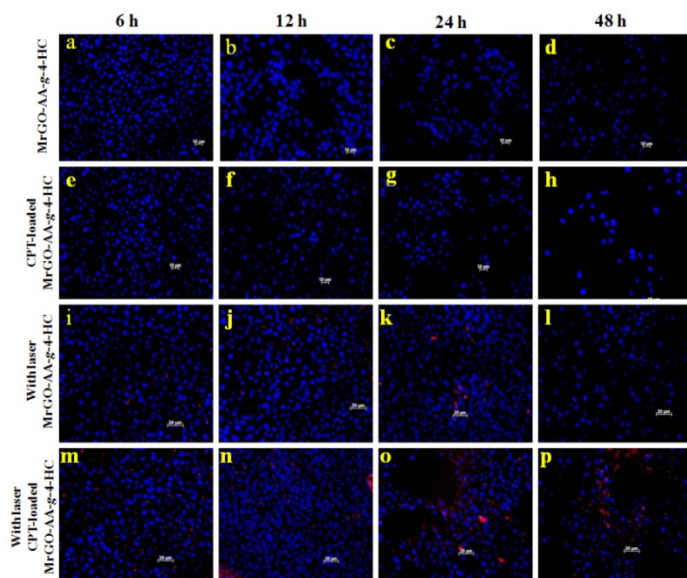

**S.Figure5.** Fluorescence microscopy images of human breast cancer MCF-7 cell lines treated with MrGO-AA-g-4-HC and CPT-loaded MrGO-AA-g-4-HC nanocarriers with and without laser irradiation (365 nm for 20 mW/cm<sup>2</sup> for 3 min) with various time manner at 6h, 12 h, 24 h, and 48 h respectively. Scale bar: ~20μm.

## 5. Analysis of Biomarker enzymes and P53 and Bax

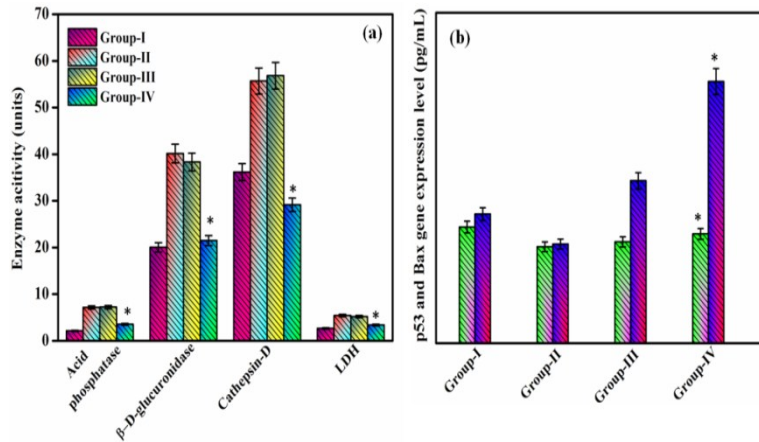

**S.Figure6 (a)** Effect of CPT unloaded, and CPT loaded nanocarrier on marker enzymes in control and experimental rats. Group I- Control; Group II -Cancer Induced; Group III- CPT unloaded treated; Group IV- CPT loaded nanocarrier. Each value is expressed as mean  $\pm$ SD for six rats in each group. \*  $P < 0.05$  group II vs. group I; \*  $P < 0.05$  group III vs. group I; \*\* $P < 0.01$  group IV vs. group I. **Figure6 (b).** Gene expression of p53 and Bax level of Group I- Control; Group II -Cancer Induced; Group III- MrGO-AA-g-4-HC treated; Group IV- CPT loaded MrGO-AA-g-4-HC nanocarrier. Each value is expressed as mean  $\pm$ SD for six rats in each group. \*  $P < 0.05$  group II vs. group I; \*  $P < 0.05$  group III vs. group I; \*\* $P < 0.01$  group IV vs. group I.
